# Supplementary material for: Immune responses associated with protection induced by chemoattenuated PfSPZ vaccine in malaria-naive Europeans
Source: PubMed Central journal article supplement (PMC11141902; doi:10.1172/jci.insight.170210), 2024-05-08
Supplement: jciinsight-9-170210-s260.pdf [file jciinsight-9-170210-s260.pdf]

**Supplementary Table 1: Lineage and subset labels for single live CD45<sup>+</sup> cells**

| <b>Lineage</b>           | <b>Subset</b>                                  | <b>Marker expression</b>                                                                                                        |
|--------------------------|------------------------------------------------|---------------------------------------------------------------------------------------------------------------------------------|
| CD4 <sup>+</sup> T cells | Naïve CD4 <sup>+</sup> T cells                 | CD3 <sup>+</sup> CD4 <sup>+</sup> CD8 <sup>-</sup> CD45RA <sup>+</sup> CD45RO <sup>-</sup> CCR7 <sup>+</sup>                    |
|                          | EM CD161 <sup>+</sup> CD4 <sup>+</sup> T cells | CD3 <sup>+</sup> CD4 <sup>+</sup> CD8 <sup>-</sup> CD45RA <sup>-</sup> CD45RO <sup>+</sup> CCR7 <sup>-</sup> CD161 <sup>+</sup> |
|                          | EM CD161 <sup>-</sup> CD4 <sup>+</sup> T cells | CD3 <sup>+</sup> CD4 <sup>+</sup> CD8 <sup>-</sup> CD45RA <sup>-</sup> CD45RO <sup>+</sup> CCR7 <sup>-</sup> CD161 <sup>-</sup> |
|                          | CM CD161 <sup>+</sup> CD4 <sup>+</sup> T cells | CD3 <sup>+</sup> CD4 <sup>+</sup> CD8 <sup>-</sup> CD45RA <sup>-</sup> CD45RO <sup>+</sup> CCR7 <sup>+</sup> CD161 <sup>+</sup> |
|                          | CM CD161 <sup>-</sup> CD4 <sup>+</sup> T cells | CD3 <sup>+</sup> CD4 <sup>+</sup> CD8 <sup>-</sup> CD45RA <sup>-</sup> CD45RO <sup>+</sup> CCR7 <sup>-</sup> CD161 <sup>-</sup> |
|                          | CD25 <sup>+</sup> CD4 <sup>+</sup> T cells     | CD3 <sup>+</sup> CD4 <sup>+</sup> CD8 <sup>-</sup> CD25 <sup>+</sup>                                                            |
|                          | CD56 <sup>+</sup> CD4 <sup>+</sup> T cells     | CD3 <sup>+</sup> CD4 <sup>+</sup> CD8 <sup>-</sup> CD45RA <sup>+</sup> CD45RO <sup>-</sup> or CD45RO <sup>+</sup>               |
| CD8 <sup>+</sup> T cells | Naïve CD8 <sup>+</sup> T cells                 | CD3 <sup>+</sup> CD4 <sup>-</sup> CD8 <sup>+</sup> CD45RA <sup>+</sup> CD45RO <sup>-</sup> CCR7 <sup>+</sup>                    |
|                          | EM CD8 T cells                                 | CD3 <sup>+</sup> CD4 <sup>-</sup> CD8 <sup>+</sup> CD45RA <sup>-</sup> CD45RO <sup>+</sup> CCR7 <sup>-</sup>                    |
|                          | CM CD8 T cells                                 | CD3 <sup>+</sup> CD4 <sup>-</sup> CD8 <sup>+</sup> CD45RA <sup>-</sup> CD45RO <sup>+</sup> CCR7 <sup>+</sup>                    |
|                          | CD56 <sup>+</sup> CD8 T cells                  | CD3 <sup>+</sup> CD4 <sup>-</sup> CD8 <sup>+</sup> CD45RA <sup>+</sup> CD45RO <sup>-</sup> or CD45RO <sup>+</sup>               |
|                          | EMRA CD8 T cells                               | CD3 <sup>+</sup> CD4 <sup>-</sup> CD8 <sup>+</sup> CD45RA <sup>+</sup> CD45RO <sup>-</sup> CCR7 <sup>-</sup>                    |
| γδ T cells               | CD161 <sup>+</sup> γδ T cells                  | CD3 <sup>+</sup> TCRγδ <sup>+</sup> CD161 <sup>+</sup>                                                                          |
|                          | CD56 <sup>+</sup> γδ T cells                   | CD3 <sup>+</sup> TCRγδ <sup>+</sup> CD56 <sup>+</sup>                                                                           |
|                          | CD45RA or CD45RO γδ T cells                    | CD3 <sup>+</sup> TCRγδ <sup>+</sup> CD45RA <sup>+</sup> CD45RO <sup>-</sup> or CD45RA <sup>-</sup> CD45RO <sup>+</sup>          |
| Unconventional T cells   | DN T cells                                     | CD3 <sup>+</sup> CD4 <sup>-</sup> CD8 <sup>-</sup>                                                                              |
|                          | CD161 <sup>hi</sup> CD8 <sup>lo</sup> T cells  | CD3 <sup>+</sup> CD4 <sup>-</sup> CD8 <sup>lo</sup> CD161 <sup>hi</sup>                                                         |
| B cells                  | IgD <sup>-</sup> or IgD <sup>+</sup> B cells   | CD19 <sup>+</sup> IgD <sup>-</sup> or IgD <sup>+</sup>                                                                          |
|                          | CD11c <sup>+</sup> B cells                     | CD19 <sup>+</sup> CD11c <sup>+</sup>                                                                                            |
|                          | Plasma cells                                   | CD19 <sup>+</sup> CD27 <sup>hi</sup> CD38 <sup>+</sup>                                                                          |
| ILCs                     | NK cells                                       | CD3 <sup>-</sup> CD19 <sup>-</sup> CD14 <sup>-</sup> CD56 <sup>+</sup> and/or CD16 <sup>+</sup>                                 |
|                          | ILC2s                                          | CD3 <sup>-</sup> CD19 <sup>-</sup> CD14 <sup>-</sup> CD25 <sup>+</sup> CD117 <sup>-</sup> CD161 <sup>+</sup> CRTH2 <sup>+</sup> |
|                          | ILC3s                                          | CD3 <sup>-</sup> CD19 <sup>-</sup> CD14 <sup>-</sup> CD25 <sup>+</sup> CD117 <sup>+</sup> CD161 <sup>+</sup> CRTH2 <sup>-</sup> |
| Monocytes and DCs        | Classical monocytes                            | CD11c <sup>+</sup> HLA-DR <sup>+</sup> CD14 <sup>+</sup> CD16 <sup>-</sup>                                                      |
|                          | non-classical and intermediate monocytes       | CD11c <sup>+</sup> HLA-DR <sup>+</sup> CD14 <sup>+</sup> CD16 <sup>+</sup> or CD14 <sup>-</sup> CD16 <sup>+</sup>               |
|                          | pDCs                                           | HLA-DR <sup>+</sup> CD123 <sup>+</sup> CD4 <sup>low</sup>                                                                       |
| Basophils                | Basophils                                      | HLA-DR <sup>-</sup> CD123 <sup>+</sup> CD25 <sup>+</sup> CRTH2 <sup>+</sup> CD38 <sup>+</sup>                                   |

**Supplementary Table 2: Surface panel.**

| <b>Label</b>      | <b>Marker</b>      | <b>Clone</b> | <b>Company</b>              | <b>Catalogue Number</b> | <b>dilution</b> |
|-------------------|--------------------|--------------|-----------------------------|-------------------------|-----------------|
| <sup>89</sup> Y   | CD45               | HI30         | Fluidijm <sup>a</sup>       | 3089003B                | 200             |
| <sup>113</sup> CD | CD45RA             | HI100        | eBiosciences <sup>b</sup>   | 83-0458-42              | 50              |
| <sup>141</sup> Pr | CD196 (CCR6)       | G034E3       | Fluidijm                    | 3141003A                | 100             |
| <sup>142</sup> Nd | CD19               | HIB19        | Fluidijm                    | 3142001B                | 200             |
| <sup>143</sup> Nd | CD117 (c-Kit)      | 104D2        | Fluidijm                    | 3143001B                | 100             |
| <sup>145</sup> Nd | CD4                | RPA-T4       | Fluidijm                    | 3145001B                | 100             |
| <sup>146</sup> Nd | CD8a               | RPA-T8       | Fluidijm                    | 3146001B                | 200             |
| <sup>147</sup> Sm | CD183 (CXCR3)      | G025H7       | Biolegend <sup>c</sup>      | 353733                  | 100             |
| <sup>148</sup> Nd | CD14               | M5E2         | Biolegend                   | 301843                  | 100             |
| <sup>149</sup> Sm | CD25 (IL-2Ra)      | 2A3          | Fluidijm                    | 3149010B                | 100             |
| <sup>150</sup> Nd | CD185 (CXCR5)      | J252D4       | Biolegend                   | 356902                  | 100             |
| <sup>151</sup> Eu | CD123              | 6H6          | Biolegend                   | 313502                  | 100             |
| <sup>152</sup> Sm | TCR $\gamma\delta$ | 11F2         | Fluidijm                    | 3152008B                | 50              |
| <sup>153</sup> Eu | CD7                | CD7-6B7      | Fluidijm                    | 3153014B                | 100             |
| <sup>154</sup> Sm | CD163              | GHI/61       | Fluidijm                    | 3154007B                | 100             |
| <sup>155</sup> Gd | CD69               | FN50         | Biolegend                   | 310939                  | 200             |
| <sup>156</sup> Gd | CD294 (CRTH2)      | BM16         | Biolegend                   | 350102                  | 50              |
| <sup>158</sup> Gd | CD122 (IL-2Rb)     | TU27         | Biolegend                   | 339015                  | 100             |
| <sup>159</sup> Tb | CD197 (CCR7)       | G043H7       | Fluidijm                    | 3159003A                | 100             |
| <sup>161</sup> Dy | KLRG1 (MAFA)       | REA261       | Miltenyi <sup>d</sup>       | Special order           | 100             |
| <sup>162</sup> Dy | CD11c              | Bu15         | Fluidijm                    | 3162005B                | 200             |
| <sup>163</sup> Dy | IgD                | IA6-2        | Biolegend                   | 348235                  | 200             |
| <sup>164</sup> Dy | CD161              | HP-3G10      | Fluidijm                    | 3164009B                | 100             |
| <sup>165</sup> Ho | CD127 (IL-7Ra)     | AO19D5       | Fluidijm                    | 3165008B                | 200             |
| <sup>166</sup> Er | CD141 (BDCA3)      | 1A4          | BD Biosciences <sup>e</sup> | 559780                  | 200             |
| <sup>167</sup> Er | CD27               | O323         | Fluidijm                    | 3167002B                | 200             |
| <sup>168</sup> Er | HLA-DR             | L243         | Biolegend                   | 307651                  | 200             |
| <sup>170</sup> Er | CD3                | UCHT1        | Fluidijm                    | 3170001B                | 100             |
| <sup>171</sup> Yb | CD28               | CD28.2       | Biolegend                   | 302937                  | 200             |
| <sup>172</sup> Yb | CD38               | HIT2         | Fluidijm                    | 3172007B                | 200             |
| <sup>173</sup> Yb | CD45RO             | UCHL1        | Biolegend                   | 304239                  | 100             |
| <sup>174</sup> Yb | CD335 (NKp46)      | 92E          | Biolegend                   | 331908                  | 100             |
| <sup>175</sup> Lu | CD279 (PD-1)       | EH 12.2H7    | Fluidijm                    | 3175008B                | 100             |
| <sup>176</sup> Yb | CD56               | NCAM16.2     | Fluidijm                    | 3176008B                | 100             |
| <sup>198</sup> Pt | CD86               | IT2.2        | Biolegend                   | 305435                  | 200             |
| <sup>209</sup> Bi | CD16               | 3G8          | Fluidijm                    | 3209002B                | 400             |

<sup>a</sup>Fluidijm, South San Francisco, CA, USA. <sup>b</sup>eBioscience, San Diego, CA, USA. <sup>c</sup>Biolegend, San Diego, CA, USA. <sup>d</sup>Miltenyi Biotech, Bergisch Gladbach, Germany. <sup>e</sup>BD Biosciences, San Jose, CA, USA. CCR, C-C chemokine receptor. CD, cluster of differentiation. CRTH2, prostaglandin D2 receptor 2. CXCR, CXC chemokine receptor. HLA-DR, human leukocyte antigen-D-related. IL-2R, interleukin-2 receptor. IL7R $\alpha$ , interleukin-7 receptor  $\alpha$ . KLRG1, killer cell lectin-like receptor subfamily G member 1. MAFA, mast cell function-associated antigen. PD-1, programmed cell death protein. TCR, T-cell receptor.

**Supplementary Table 3: Cytokine panel.**

| <b>Label</b> | <b>Marker</b>      | <b>Clone</b> | <b>Company</b>            | <b>Catalogue Number</b> | <b>dilution</b> |
|--------------|--------------------|--------------|---------------------------|-------------------------|-----------------|
| <b>089Y</b>  | CD45               | HI30         | Fluidigm <sup>a</sup>     | 3089003B                | 200             |
| <b>113CD</b> | CD45RA             | HI100        | eBiosciences <sup>b</sup> | 83-0458-42              | 50              |
| <b>141Pr</b> | CD196 (CCR6)       | G034E3       | Fluidigm                  | 3141003A                | 100             |
| <b>142Nd</b> | CD19               | HIB19        | Fluidigm                  | 3142001B                | 200             |
| <b>143Nd</b> | CD117 (c-Kit)      | 104D2        | Fluidigm                  | 3143001B                | 100             |
| <b>144Nd</b> | IL2                | MQ117H12     | Biologend <sup>c</sup>    | 500339                  | 400             |
| <b>145Nd</b> | CD4                | RPA-T4       | Fluidigm                  | 3145001B                | 100             |
| <b>146Nd</b> | CD8a               | RPA-T8       | Fluidigm                  | 3146001B                | 200             |
| <b>147Sm</b> | CD183 (CXCR3)      | G025H7       | Biologend                 | 353733                  | 100             |
| <b>148Nd</b> | CD14               | M5E2         | Biologend                 | 301843                  | 100             |
| <b>149Sm</b> | CD25 (IL-2Ra)      | 2A3          | Fluidigm                  | 3149010B                | 100             |
| <b>150Nd</b> | CD185 (CXCR5)      | J252D4       | Biologend                 | 356902                  | 100             |
| <b>151Eu</b> | CD123              | 6H6          | Biologend                 | 313502                  | 100             |
| <b>152Sm</b> | TCR $\gamma\delta$ | 11F2         | Fluidigm                  | 3152008B                | 50              |
| <b>153Eu</b> | CD7                | CD7-6B7      | Fluidigm                  | 3153014B                | 100             |
| <b>154Sm</b> | CD163              | GHI/61       | Fluidigm                  | 3154007B                | 100             |
| <b>155Gd</b> | IFN $\gamma$       | B27          | Biologend                 | 506521                  | 400             |
| <b>156Gd</b> | CD294 (CRTH2)      | BM16         | Biologend                 | 350102                  | 50              |
| <b>158Gd</b> | CD122 (IL-2Rb)     | TU27         | Biologend                 | 339015                  | 100             |
| <b>159Tb</b> | CD197 (CCR7)       | G043H7       | Fluidigm                  | 3159003A                | 100             |
| <b>160Gd</b> | TNF $\alpha$       | MAb11        | Biologend                 | 502941                  | 400             |
| <b>161Dy</b> | KLRG1 (MAFA)       | REA261       | Miltenyi <sup>d</sup>     | Special order           | 100             |
| <b>162Dy</b> | CD11c              | Bu15         | Fluidigm                  | 3162005B                | 200             |
| <b>163Dy</b> | IL-17              | BL168        | Biologend                 | 512331                  | 400             |
| <b>164Dy</b> | CD161              | HP-3G10      | Fluidigm                  | 3164009B                | 100             |
| <b>165Ho</b> | CD127 (IL-7Ra)     | AO19D5       | Fluidigm                  | 3165008B                | 200             |
| <b>166Er</b> | IL10               | JES39D7      | Fluidigm                  | 3166008B                | 400             |
| <b>167Er</b> | CD27               | O323         | Fluidigm                  | 3167002B                | 200             |
| <b>168Er</b> | HLA-DR             | L243         | Biologend                 | 307651                  | 200             |
| <b>169Tm</b> | IL4                | MP4-25D2     | Fluidigm                  | 3169016B                | 400             |
| <b>169Tm</b> | IL5                | TRFK5        | Biologend                 | 500829                  | 400             |
| <b>169Tm</b> | IL13               | JES105A2     | Biologend                 | 504309                  | 400             |
| <b>170Er</b> | CD3                | UCHT1        | Fluidigm                  | 3170001B                | 100             |
| <b>171Yb</b> | CD28               | CD28.2       | Biologend                 | 302937                  | 200             |
| <b>172Yb</b> | CD38               | HIT2         | Fluidigm                  | 3172007B                | 200             |
| <b>173Yb</b> | CD45RO             | UCHL1        | Biologend                 | 304239                  | 100             |
| <b>174Yb</b> | CD335 (NKp46)      | 92E          | Biologend                 | 331908                  | 100             |
| <b>175Lu</b> | CD279 (PD-1)       | EH 12.2H7    | Fluidigm                  | 3175008B                | 100             |
| <b>176Yb</b> | CD56               | NCAM16.2     | Fluidigm                  | 3176008B                | 100             |
| <b>198Pt</b> | CD86               | IT2.2        | Biologend                 | 305435                  | 200             |
| <b>209Bi</b> | CD16               | 3G8          | Fluidigm                  | 3209002B                | 400             |

<sup>a</sup>Fluidigm, South San Francisco, CA, USA. <sup>b</sup>eBioscience, San Diego, CA, USA. <sup>c</sup>Biologend, San Diego, CA, USA. <sup>d</sup>Miltenyi Biotec, Bergisch Gladbach, Germany. CCR, C-C chemokine receptor. CD, cluster of differentiation. CRTH2, prostaglandin D2 receptor 2. CXCR, CXC chemokine receptor. HLA-DR, human

leukocyte antigen-D-related. IL-2R, interleukin-2 receptor. IL7R $\alpha$ , interleukin-7 receptor  $\alpha$ . KLRG1, killer cell lectin-like receptor subfamily G member 1. MAFA, mast cell function-associated antigen. PD-1, programmed cell death protein. TCR, T-cell receptor. Markers in grey were stained intracellular, while all other markers were stained on the cell surface.

**Supplementary Table 4:** Parasites per mL of blood, assessed by qPCR and by thick blood smear (TBS), per donor within the different study groups. Daily analyses were performed from day 6 to 21 post-inoculation of PfSPZ. Slides were considered positive when at least two parasites were detected within 300 microscope fields of view. If only one parasite-like structure was identified in 300 fields by a microscopist the slide was reported as negative to avoid false-positive results because of staining artefacts. Two trained microscopists examined each slide. In case of discrepancy between the results of the two readers, a third expert reader assessed the slide. The day of TBS positivity correlates with the peak of parasitemia detected by qPCR. After positive results from both PCR and TBS, further assessment of parasitemia was not conducted. Therefore, those particular days are indicated as N/A (not applicable) in the table.

## Day of parasitemia test

| Participant ID | Group         | Parasitemia (parasite/mL) | day 6 | day 7 | day 8 | day 9 | day 10 | day 11 | day 12 | day 13 | day 14 | day 15 | day 16 | day 17 | day 18 | day 19 | day 20 | day 21 |
|----------------|---------------|---------------------------|-------|-------|-------|-------|--------|--------|--------|--------|--------|--------|--------|--------|--------|--------|--------|--------|
| T2.002         | Protected     | qPCR                      | 0     | 0     | 0     | 0     | 0      | 0      | 0      | 0      | 0      | 0      | 0      | 0      | 0      | 0      | 0      | 0      |
| T2.006         | Protected     | qPCR                      | 0     | 0     | 0     | 0     | 0      | 0      | 0      | 0      | 0      | 0      | 0      | 0      | 0      | 0      | 0      | 0      |
| T2.038         | Protected     | qPCR                      | 0     | 0     | 0     | 0     | 0      | 0      | 0      | 0      | 0      | 0      | 0      | 0      | 0      | 0      | 0      | 0      |
| T2.067         | Protected     | qPCR                      | 0     | 0     | 0     | 0     | 0      | 0      | 0      | 0      | 0      | 0      | 0      | 0      | 0      | 0      | 0      | 0      |
| T2.010         | Non-Protected | qPCR                      | 0     | 2     | 26    | 20    | 0      | 2059   | 4066   | 7185   | N/A    | N/A    | N/A    | N/A    | N/A    | N/A    | N/A    | N/A    |
| T2.012         | Non-Protected | qPCR                      | 0     | 106   | 71    | 1150  | 933    | 10501  | 44300  | N/A    | N/A    | N/A    | N/A    | N/A    | N/A    | N/A    | N/A    | N/A    |
| T2.022         | Non-Protected | qPCR                      | 0     | 11    | 99    | 295   | 171    | 7521   | 5494   | 83570  | N/A    | N/A    | N/A    | N/A    | N/A    | N/A    | N/A    | N/A    |
| T2.046         | Non-Protected | qPCR                      | 0     | 6     | 12    | 52    | 52     | 373    | 2393   | 792    | N/A    | N/A    | N/A    | N/A    | N/A    | N/A    | N/A    | N/A    |
| T2.005         | Placebo       | qPCR                      | 0     | 108   | 1077  | 909   | 482    | 14376  | N/A    | N/A    | N/A    | N/A    | N/A    | N/A    | N/A    | N/A    | N/A    | N/A    |
| T2.047         | Placebo       | qPCR                      | 0     | 7     | 903   | 299   | 414    | 2213   | N/A    | N/A    | N/A    | N/A    | N/A    | N/A    | N/A    | N/A    | N/A    | N/A    |
| T2.055         | Placebo       | qPCR                      | 0     | 57    | 626   | 381   | 1009   | 12048  | 20202  | N/A    | N/A    | N/A    | N/A    | N/A    | N/A    | N/A    | N/A    | N/A    |
| T2.063         | Placebo       | qPCR                      | 0     | 39    | 112   | 27    | 2      | 43     | 1      | 34     | 74     | 1288   | 550    | 2399   | 48978  | N/A    | N/A    | N/A    |
| T2.002         | Protected     | TBS                       | 0     | 0     | 0     | 0     | 0      | 0      | 0      | 0      | 0      | 0      | 0      | 0      | 0      | 0      | 0      | 0      |
| T2.006         | Protected     | TBS                       | 0     | 0     | 0     | 0     | 0      | 0      | 0      | 0      | 0      | 0      | 0      | 0      | 0      | 0      | 0      | 0      |
| T2.038         | Protected     | TBS                       | 0     | 0     | 0     | 0     | 0      | 0      | 0      | 0      | 0      | 0      | 0      | 0      | 0      | 0      | 0      | 0      |
| T2.067         | Protected     | TBS                       | 0     | 0     | 0     | 0     | 0      | 0      | 0      | 0      | 0      | 0      | 0      | 0      | 0      | 0      | 0      | 0      |
| T2.010         | Non-Protected | TBS                       | 0     | 0     | 0     | 0     | 0      | 0      | 0      | 1      | N/A    | N/A    | N/A    | N/A    | N/A    | N/A    | N/A    | N/A    |
| T2.012         | Non-Protected | TBS                       | 0     | 0     | 0     | 0     | 0      | 0      | 7      |        | N/A    | N/A    | N/A    | N/A    | N/A    | N/A    | N/A    | N/A    |
| T2.022         | Non-Protected | TBS                       | 0     | 0     | 0     | 0     | 0      | 0      | 0      | 12     | N/A    | N/A    | N/A    | N/A    | N/A    | N/A    | N/A    | N/A    |
| T2.046         | Non-Protected | TBS                       | 0     | 0     | 0     | 0     | 0      | 0      | 0      | 1      | N/A    | N/A    | N/A    | N/A    | N/A    | N/A    | N/A    | N/A    |
| T2.005         | Placebo       | TBS                       | 0     | 0     | 0     | 0     | 0      | 4      | N/A    | N/A    | N/A    | N/A    | N/A    | N/A    | N/A    | N/A    | N/A    | N/A    |
| T2.047         | Placebo       | TBS                       | 0     | 0     | 0     | 0     | 0      | 4      | N/A    | N/A    | N/A    | N/A    | N/A    | N/A    | N/A    | N/A    | N/A    | N/A    |
| T2.055         | Placebo       | TBS                       | 0     | 0     | 0     | 0     | 0      | 0      | 3      | N/A    | N/A    | N/A    | N/A    | N/A    | N/A    | N/A    | N/A    | N/A    |
| T2.063         | Placebo       | TBS                       | 0     | 0     | 0     | 0     | 0      | 0      | 0      | 0      | 0      | 0      | 0      | 0      | 1      | N/A    | N/A    | N/A    |

**Supplementary Table 5:** Change in cluster frequencies from c-1 to d11 per group (Placebo, Non-protected and Protected). The change overtime was analyzed per group using the linear mixed model, and the p-value was adjusted using false discovery rate (FDR) correction. In red are the significant p-values ( $p \leq 0.05$ ) per clusters after FDR correction within each group.

| Lineage                | Cluster_ID | FDR_p-Value (c-1 to d-11) |               |           |
|------------------------|------------|---------------------------|---------------|-----------|
|                        |            | Placebo                   | Non-protected | Protected |
| CD4                    | 3          | 0,0010                    | 0,8752        | 0,7483    |
| CD4                    | 4          | 0,0007                    | 0,6320        | 0,8556    |
| CD4                    | 6          | 0,0382                    | 0,7610        | 0,9307    |
| CD4                    | 9          | 0,0236                    | 0,0421        | 0,8556    |
| CD4                    | 13         | 0,0041                    | 0,6831        | 0,9307    |
| CD4                    | 22         | 0,4674                    | 0,7676        | <0.0001   |
| CD4                    | 24         | 0,0505                    | 0,6467        | 0,8556    |
| CD4                    | 27         | 0,5403                    | 0,0990        | <0.0001   |
| CD4                    | 35         | <0.0001                   | 0,8345        | 0,7483    |
| CD4                    | 36         | 0,2208                    | 0,7610        | 0,0531    |
| CD4                    | 37         | 0,7865                    | 0,6320        | 0,0011    |
| CD4                    | 38         | 0,0367                    | 0,0390        | 0,9490    |
| CD4                    | 40         | 0,0137                    | 0,8188        | 0,9307    |
| CD4                    | 41         | 0,0576                    | 0,8752        | 0,9534    |
| CD8                    | 44         | 0,3322                    | 0,7610        | 0,0017    |
| CD8                    | 46         | 0,9875                    | 0,9553        | <0.0001   |
| CD8                    | 49         | 0,5020                    | 0,7676        | 0,0468    |
| CD8                    | 50         | 0,0599                    | 0,8464        | 0,9307    |
| CD8                    | 51         | 0,0185                    | 0,7610        | 0,8556    |
| CD8                    | 55         | 0,0007                    | 0,6320        | 0,4651    |
| CD8                    | 63         | 0,0505                    | 0,8752        | 0,8247    |
| CD8                    | 64         | 0,0382                    | 0,8908        | 0,8556    |
| CD8                    | 67         | 0,2293                    | 0,9052        | 0,001     |
| CD8                    | 71         | <0.0001                   | 0,9394        | 0,9307    |
| CD8                    | 74         | <0.0001                   | 0,8752        | 0,7612    |
| $\gamma\delta$ T       | 76         | 0,0185                    | 0,9790        | 0,8556    |
| $\gamma\delta$ T       | 81         | 0,7326                    | 0,8752        | 0,0011    |
| CD8                    | 93         | <0.0001                   | 0,0421        | 0         |
| CD8                    | 96         | 0,6938                    | 0,7610        | <0.0001   |
| Unconventional t cells | 102        | 0,0576                    | 0,8464        | 0,8556    |
| Unconventional t cells | 105        | 0,8427                    | 0,0160        | 0,8556    |
| Unconventional t cells | 107        | <0.0001                   | 0,8561        | 0,7821    |
| B                      | 116        | <0.0001                   | 0,6831        | 0,9490    |
| B                      | 119        | 0,0505                    | 0,7923        | 0,9490    |
| B                      | 120        | 0,0392                    | 0,5850        | 0,8556    |
| B                      | 121        | 0,8527                    | 0,6320        | 0,0011    |
| ILCs                   | 122        | 0,6739                    | 0,8908        | 0,0188    |
| ILCs                   | 123        | 0,0198                    | 0,7610        | 0,8556    |
| ILCs                   | 130        | 0,2002                    | 0,9790        | <0.0001   |
| Monocytes and DCs      | 131        | 0,0505                    | 0,6831        | 0,8556    |
| Monocytes and DCs      | 135        | 0,0137                    | 0,8752        | 0,8556    |
| Monocytes and DCs      | 138        | 0,0726                    | 0,7610        | <0.0001   |
| Monocytes and DCs      | 139        | <0.0001                   | 0,7610        | 0,0059    |

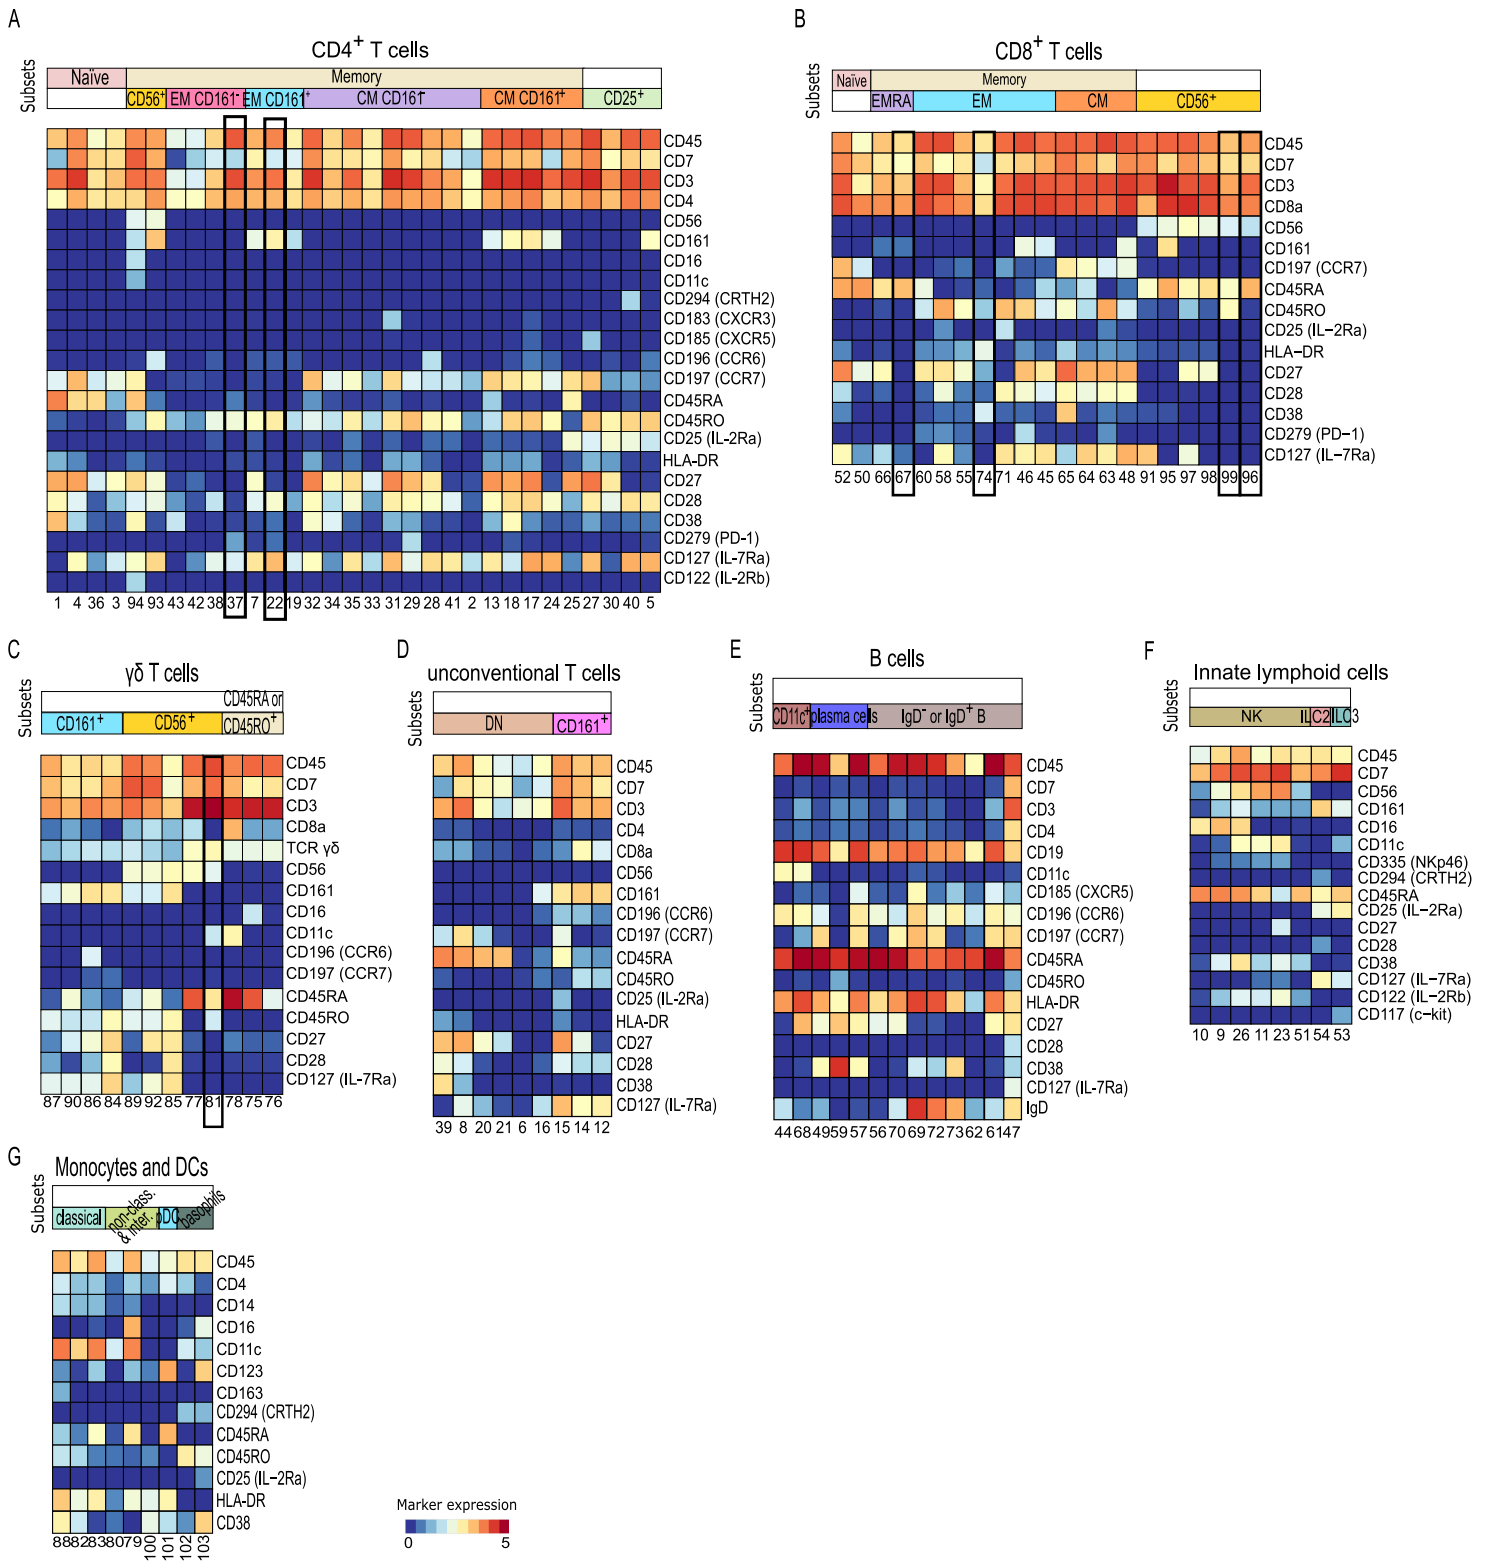

**Supplementary Figure 1:** Heatmap showing expression of markers as median signal intensity (MSI) after arsinh transformation for 103 clusters identified. Each cluster has a unique cluster number and are shown within (A) CD4<sup>+</sup> T cells, (B) CD8<sup>+</sup> T cells, (C) γδ T cell, (D) unconventional T cells, (E) B cells, (F) innate lymphoid cells, and (G) monocytes and DCs lineages. Subsets to which each cluster belongs is shown in the upper horizontal panels. The colors are specific per row and lineages and are independent of colors in others rows and lineages

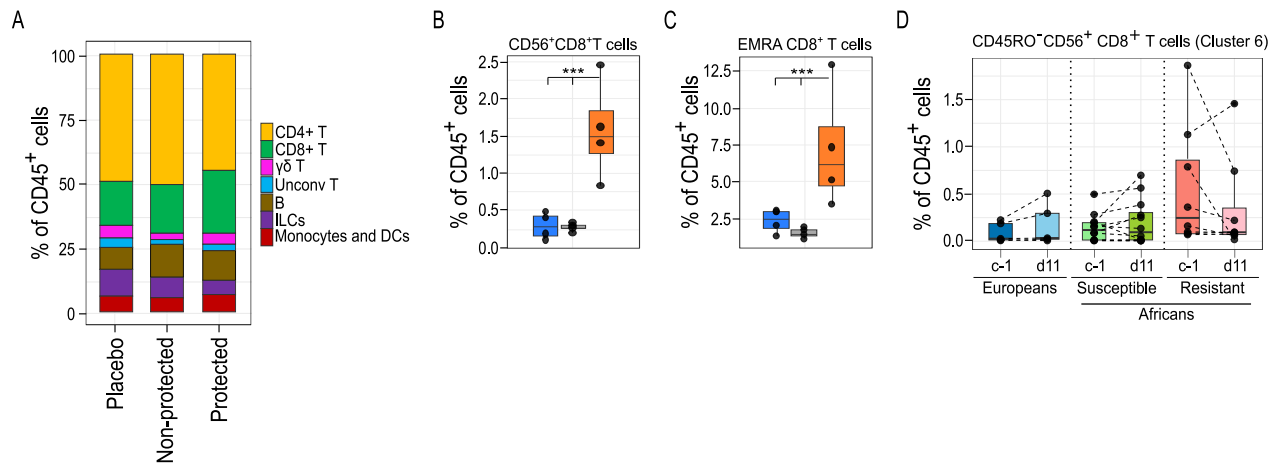

**Supplementary Figure 2:** (A) Cell frequency relative to total CD45<sup>+</sup> cells between placebo, non-protected, and protected per lineages. Differences between the groups in lineages abundance were tested using the GLME model. (B) CD56<sup>+</sup> CD8<sup>+</sup> T cells subset frequency relative to CD45<sup>+</sup> cells compared between placebo (n= 4) in blue, non-protected (n= 4) in grey, and protected (n= 4) in orange; FDR-adjusted p-value <0.001. (C) EMRA CD8<sup>+</sup> T cells subset frequency relative to CD45<sup>+</sup> cells between groups as indicated; FDR - adjusted p-value < 0.001. (D) CD56<sup>+</sup> CD8<sup>+</sup> T cell cluster negative for CD45RO expression (cluster 6) from c-1 to d11, as percentage of CD45<sup>+</sup>, between Europeans (n= 5), susceptible (n= 12) and resistant Africans (n= 8). Data in B, C, and D are representing in boxplots showing the median, the 1<sup>st</sup> and 3<sup>rd</sup> quartile, with the whiskers extended no further than 1.5x the interquartile range (IQR).



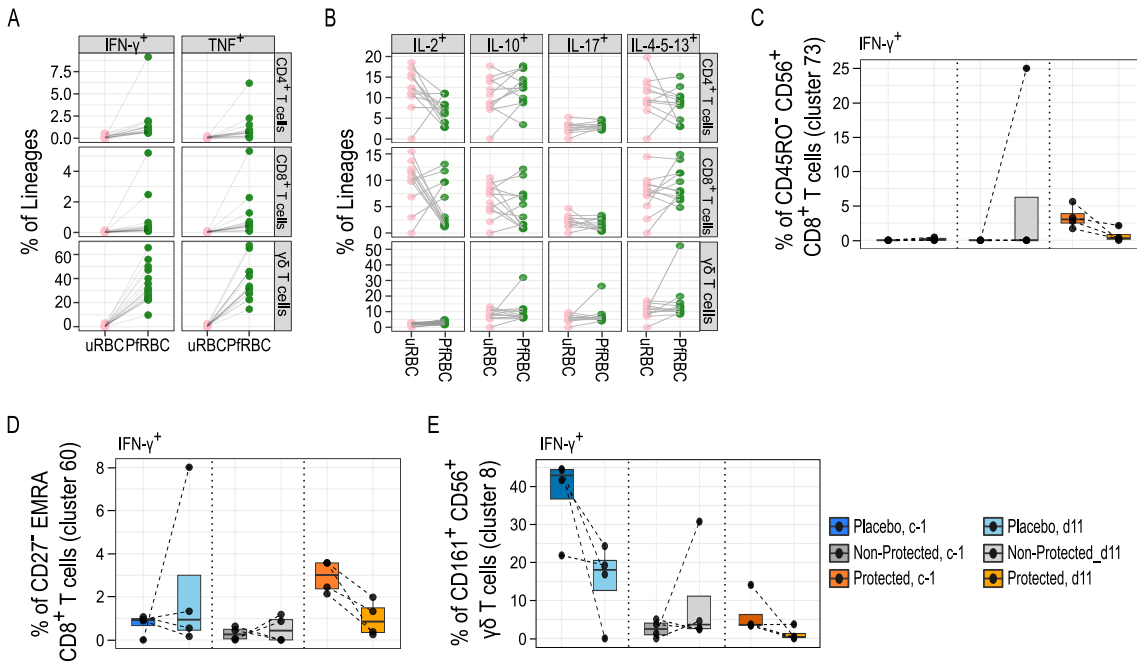

**Supplementary Figure 3:** (A) IFN- $\gamma$ , TNF (B), IL-2, IL-10, IL-17, and IL-4-5-13 producing CD4<sup>+</sup>, CD8<sup>+</sup> and  $\gamma\delta$  T cells between uRBC controls (pink) and PIRBC (green). (C) Frequency of IFN- $\gamma$  producing CD56<sup>+</sup> CD8<sup>+</sup> T cells (cluster 73), (D) EMRA CD8<sup>+</sup> T cells (cluster 60), and (E) CD56<sup>+</sup>  $\gamma\delta$  T (cluster 8), from c-1 to d11 as percentage of parent, between the indicated groups. The boxplots represent the median, the 1<sup>st</sup> and the 3<sup>rd</sup> quartile, while the whiskers is extended no further than 1.5x the interquartile range (IQR).

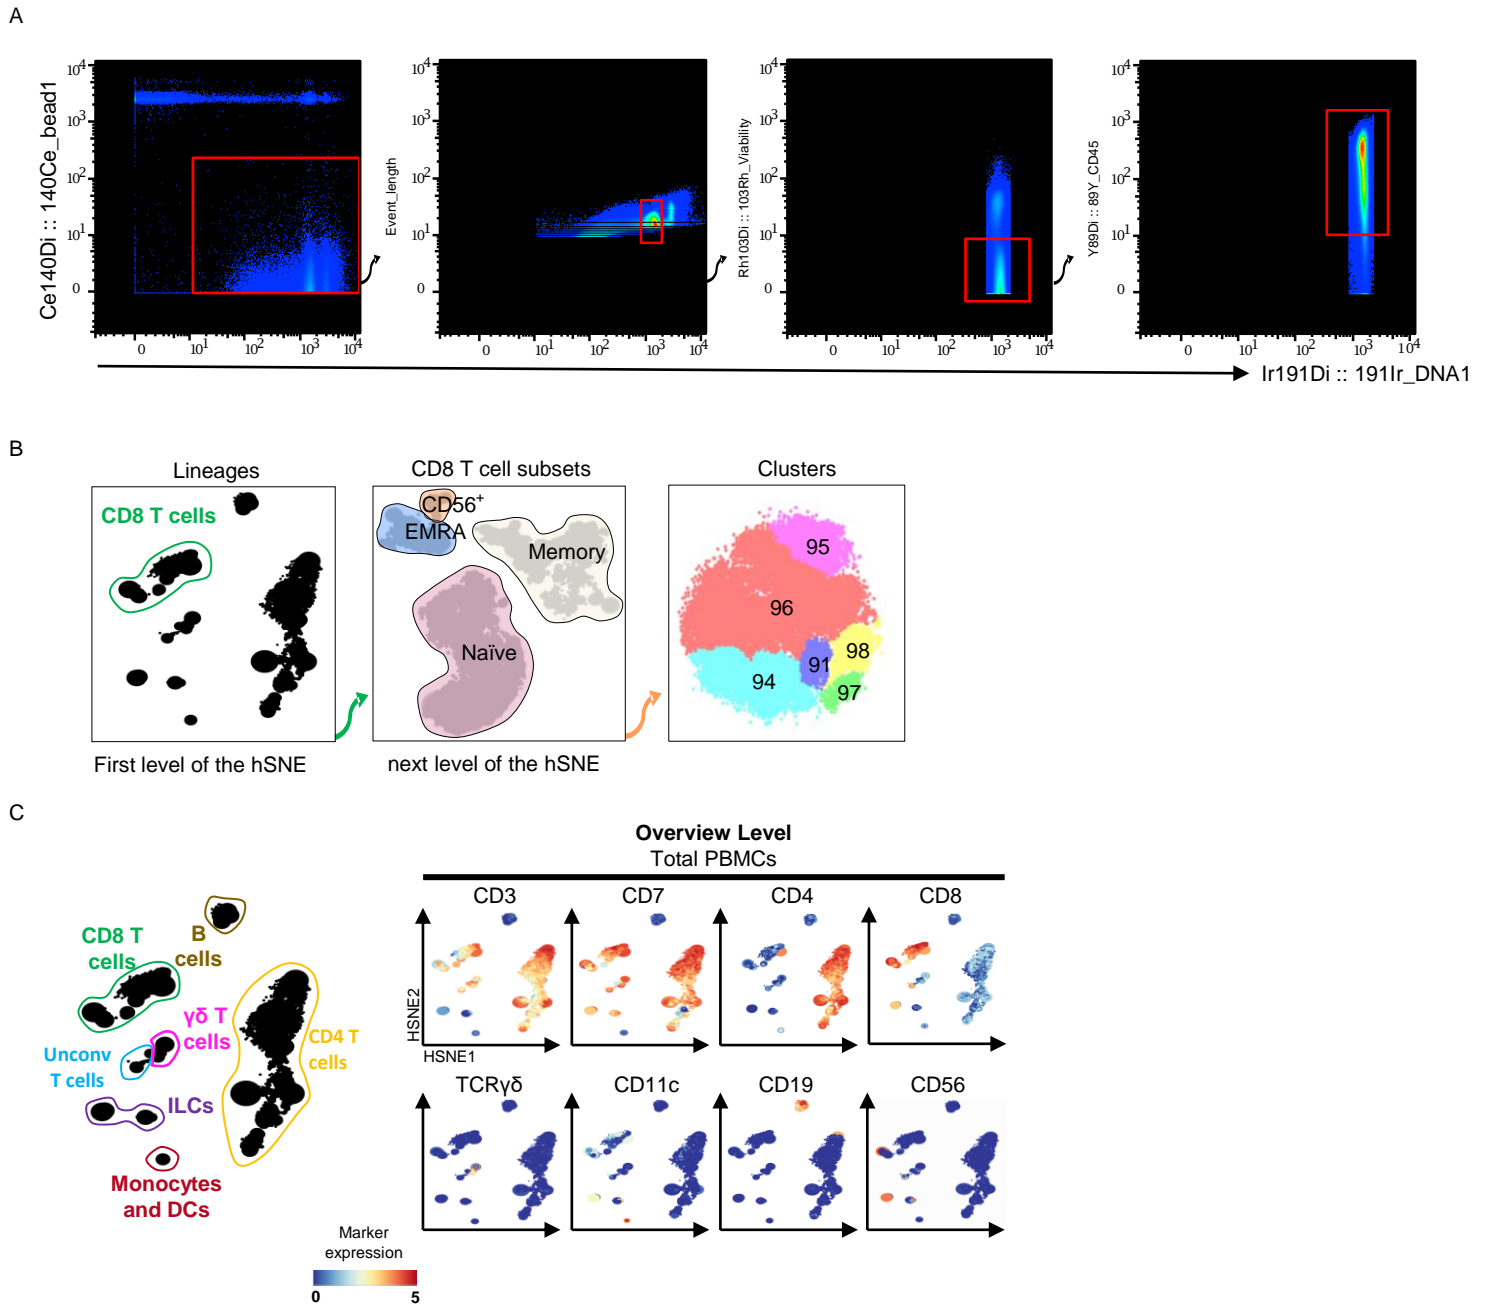

**Supplementary Figure 4:** (A) Flow cytometry gating strategy for CD45<sup>+</sup> cells after Helios<sup>TM</sup> analysis (Fluidigm). Using Flowjo software version 10, cells were first gated on beads and DNA to discriminate the cells from the calibration beads. Next, singlets were selected using even length and DNA. Thereafter, cells were gated using intercalator-103Rh and DNA to select live cells. Subsequently, CD45<sup>+</sup> cells were gated. (B) HSNE analysis on Cytosplore. At the first level of the HSNE lineages are defined. At the next level, subsets are defined and so on until the cluster level is reached. The illustration here of CD56<sup>+</sup> CD8<sup>+</sup> T cells analysis in Cytosplore. (C) First HSNE level embedding depicting the major immune lineages.
